# Supplementary material for: Generation characteristics and spreading risk of VOCs released from a biological fermentation pharmaceutical factory
Source: Royal Society of Chemistry journal article supplement (doi:10.1039/d2em00378c), 2022-12-17
Supplement: d2em00378c1.pdf [file d2em00378c1.pdf]

1

## Supplemental Information

2

**The generation characteristics and spreading risk of VOCs released**

3

**from a biological fermentation pharmaceutical factory**

4

Yanjie Wang<sup>1,2</sup>, Huiling Song<sup>1,3</sup>, Lin Li<sup>2</sup>, Jiawei Ma<sup>2</sup>, Fangfang Yu<sup>1\*</sup>

5

1 College of Public Health, Zhengzhou University, Zhengzhou, Henan, 450000, PR China

6

2 State Key Laboratory of Environmental Aquatic Chemistry, Research Center for Eco-

7

Environmental Sciences, Chinese Academy of Sciences, Beijing, 100085, PR China

8

3 Department of Medical, Xi'an Gem Flower Changqing Hospital

9

\* Email: yufangfang@zzu.edu.cn

- 11 Tables captions
- 12 Table S1 Classification of gases detected during fermentation
- 13 Table S2 Parameters and reference value used for risk assessment of VOCs
- 14 Table S3 Olfactory effect analysis.
- 15 Table S4 Cancer risk of the health-related VOCs

17 Table S1 Classification of gases detected during fermentation (VOCs: Volatile  
 18 organic compounds)

| Species                                    | Composition                                                                                                                                                                                                                                |
|--------------------------------------------|--------------------------------------------------------------------------------------------------------------------------------------------------------------------------------------------------------------------------------------------|
| Chlorine-containing organics<br>(15.11%)   | 1-Chloro-2-methylpropane, 2-Chloro-2-methylpropane,<br>Allyl Chloride, Carbon Tetrachloride, Chloroform,<br>Dichloromethane, Trichloroacetic Acid                                                                                          |
| Nitrogen-containing organics<br>(19.93%)   | 1-Methyl-2-pyrrolidinone, Diethylamine, N-<br>Nitrosodibutylamine, N-Nitrosodiethylamine,<br>Dimethylhydrazine                                                                                                                             |
| VOCs<br>(95.76%)                           | Propylene Oxide, 1-Heptaldehyde, Acetaldehyde,<br>Hexanaldehyde, Propanal, Butyraldehyde,<br>Crotonaldehyde, 2-Pentanone, Methyl ethyl ketone,<br>Dimethyl heptanone, Butyl Acetate, Methyl Cellosolve<br>Acetate, Vinyl Acetate, methanol |
| Oxygen-containing organics<br>(40.73%)     |                                                                                                                                                                                                                                            |
| Aromatic hydrocarbon compounds<br>(13.35%) | Benzene, Indene, O-Xylene, Phenol, Chlorobenzene                                                                                                                                                                                           |
| Phosphorous organics (3.55%)               | Trimethyl Phosphite                                                                                                                                                                                                                        |
| Sulfur-containing organics (2.20%)         | Sulfuryl Fluoride, Thionyl Fluoride, Sulfur Hexafluoride                                                                                                                                                                                   |
| Alkane (0.88%)                             | Ethane, Cyclohexane                                                                                                                                                                                                                        |
| Inorganic compounds (4.24%)                | SO <sub>2</sub> F <sub>2</sub> , N <sub>2</sub> O, NO <sub>2</sub> , SOF <sub>2</sub> , NH <sub>3</sub> , HCN, CO, SO <sub>2</sub>                                                                                                         |

- 21 Table S2 Parameters and reference value used for risk assessment of VOCs (VOCs:  
 22 Volatile organic compounds, CASRN: Chemical abstracts service registry number,  
 23 Group: Group of carcinogens by the International Agency for Research on Cancer,  
 24 Group 1: Carcinogenic to humans, Group 2A: Probably carcinogenic to humans,  
 25 Group 2B: Possibly carcinogenic to humans.)

| Parameter                       | Units   | Values                      |                                                                |        |
|---------------------------------|---------|-----------------------------|----------------------------------------------------------------|--------|
|                                 |         | Adult male                  | Adult female                                                   |        |
| Time for exposure(Te)           | h/d     | 8                           | 8                                                              |        |
| Duration for exposure(De)       | yr      | 30                          | 30                                                             |        |
| Annual exposure frequently(AEF) | d/yr    | 250                         | 250                                                            |        |
| Average lifetime(AT)            | h       | $72.4 \times 365 \times 24$ | $77.4 \times 365 \times 24$                                    |        |
| VOCs                            | CASRN   | Group                       | Inhalation unit risk(IUR)[(ug/m <sup>3</sup> ) <sup>-1</sup> ] | Source |
| Benzene                         | 71-43-2 | 1                           | $7.8 \times 10^{-6}$                                           | IRIS   |
| Dichloromethane                 | 75-09-2 | 2A                          | $1 \times 10^{-8}$                                             | IRIS   |
| Acetaldehyde                    | 75-07-0 | 2B                          | $2.2 \times 10^{-6}$                                           | IRIS   |
| Propylene Oxide                 | 75-56-9 | 2B                          | $3.7 \times 10^{-6}$                                           | IRIS   |
| Carbon Tetrachloride            | 56-23-5 | 2B                          | $6 \times 10^{-6}$                                             | IRIS   |

Table S3 Olfactory effect analysis (OT<sub>i</sub>: odour detected threshold of compound i (mg/m<sup>3</sup>), OAV<sub>i</sub>: odour activity value of compound i, PO<sub>i</sub>: odour contribution rate of compound i, TOAV: total odour activity value, (10 hours, 60 hours, 110 hours, 160 hours, 200 hours, 240 hours mean different fermentation time in a complete fermentation cycle.)

| compounds       | OT <sub>i</sub> (mg/m <sup>3</sup> ) | 10 h             |                     | 60 h             |                     | 110 h            |                     | 160 h            |                     | 200 h            |                     | 240 h            |                     |
|-----------------|--------------------------------------|------------------|---------------------|------------------|---------------------|------------------|---------------------|------------------|---------------------|------------------|---------------------|------------------|---------------------|
|                 |                                      | OAV <sub>i</sub> | PO <sub>i</sub> (%) |
| Carbon          | 28.91                                | 5.17             | 0.02%               | 0.58             | 0.00%               |                  |                     |                  |                     |                  |                     |                  |                     |
| Tetrachloride   |                                      |                  |                     |                  |                     |                  |                     |                  |                     |                  |                     |                  |                     |
| Chloroform      | 18.46                                | 2.62             | 0.01%               |                  |                     |                  |                     |                  |                     |                  |                     |                  |                     |
| Dichloromethane | 555.10                               | 0.86             | 0.00%               |                  |                     |                  |                     |                  |                     |                  |                     |                  |                     |
| Diethylamine    | 0.14                                 | 67.71            | 0.20%               |                  |                     |                  |                     |                  |                     |                  |                     | 2030             | 37.11%              |
| Acetaldehyde    | 0.0027                               | 18594.24         | 55.69%              | 18594.24         | 76.61%              |                  |                     | 71740            | 99.10%              | 12006.67         | 59.33%              |                  |                     |
| Propanal        | 0.0024                               | 12860            | 38.51%              |                  |                     |                  |                     |                  |                     |                  |                     |                  |                     |
| Butyraldehyde   | 0.0020                               |                  |                     |                  |                     | 10537.31         | 99.59%              |                  |                     | 7641.79          | 37.76%              | 3432.84          | 62.76%              |

|                        |       |        |       |             |        |         |       |        |       |         |       |      |         |
|------------------------|-------|--------|-------|-------------|--------|---------|-------|--------|-------|---------|-------|------|---------|
| Crotonaldehyde         | 0.066 | 417.39 | 1.25% | 285.47      | 1.18%  |         |       | 589.13 | 0.81% | 544.78  | 2.69% |      |         |
| Methyl ethyl<br>ketone | 1.29  | 215.43 | 0.65% |             |        |         |       |        |       |         |       |      |         |
| Butyl Acetate          | 0.076 | 1070   | 3.20% | 2591.7<br>4 | 10.68% |         |       |        |       |         |       |      |         |
| Benzene                | 8.60  | 14.76  | 0.04% |             |        | 17.38   | 0.16% | 13.88  | 0.02% | 14.76   | 0.07% | 7.30 | 0.13%   |
| o-Xylene               | 1.64  |        |       | 9.43        | 0.04%  |         |       | 29.68  | 0.04% | 29.74   | 0.15% |      |         |
| Phenol                 | 0.021 | 142.86 | 0.43% | 2756.7<br>3 | 11.36% |         |       |        |       |         |       |      |         |
| Carbon Disulfide       | 0.65  |        |       | 31.76       | 0.13%  | 19.76   | 0.19% | 17.62  | 0.02% |         |       |      |         |
| Carbonyl Sulfide       | 0.13  |        |       |             |        |         |       |        |       |         |       |      |         |
| Cyclohexane            | 8.57  |        |       | 0.13        | 0.00%  | 5.81    | 0.05% |        |       |         |       |      |         |
| TOAV                   |       | 33391. |       | 24270.      |        | 10580.2 |       | 72390. |       | 20237.7 |       |      | 5470.14 |
|                        |       | 51     |       | 08          |        | 6       |       | 32     |       | 4       |       |      |         |

Table S4 Cancer risk of the health-related VOCs (Rt: total carcinogenic risk. (10 hours, 60 hours, 110 hours, 160 hours, 200 hours, and 240 hours mean different fermentation times in a complete fermentation cycle.)

| Time  |        | Benzene               | Dichloromethane       | Acetaldehyde          | Propylene<br>Oxide    | Carbon<br>Tetrachloride | Rt                    |
|-------|--------|-----------------------|-----------------------|-----------------------|-----------------------|-------------------------|-----------------------|
| 10 h  | Meal   | $9.36 \times 10^{-5}$ | $4.51 \times 10^{-7}$ | $4.47 \times 10^{-6}$ | $7.08 \times 10^{-6}$ | $8.51 \times 10^{-5}$   | $1.91 \times 10^{-4}$ |
|       | Female | $8.76 \times 10^{-5}$ | $4.22 \times 10^{-7}$ | $4.19 \times 10^{-6}$ | $6.63 \times 10^{-6}$ | $7.63 \times 10^{-5}$   | $1.75 \times 10^{-4}$ |
| 60 h  | Male   | 0                     | 0                     | $1.04 \times 10^{-5}$ | 0                     | $9.60 \times 10^{-6}$   | $2.00 \times 10^{-5}$ |
|       | Female | 0                     | 0                     | $9.75 \times 10^{-6}$ | 0                     | $8.98 \times 10^{-6}$   | $1.87 \times 10^{-5}$ |
| 110 h | Male   | $1.10 \times 10^{-4}$ | 0                     | 0                     | 0                     | 0                       | $1.10 \times 10^{-4}$ |
|       | Female | $1.03 \times 10^{-4}$ | 0                     | 0                     | 0                     | 0                       | $1.03 \times 10^{-4}$ |
| 160 h | Male   | $8.81 \times 10^{-5}$ | 0                     | $4.02 \times 10^{-5}$ | $1.12 \times 10^{-5}$ | 0                       | $1.40 \times 10^{-4}$ |
|       | Female | $8.24 \times 10^{-5}$ | 0                     | $3.76 \times 10^{-5}$ | $1.05 \times 10^{-5}$ | 0                       | $1.31 \times 10^{-4}$ |
| 200 h | Male   | $9.36 \times 10^{-5}$ | 0                     | $6.73 \times 10^{-6}$ | $6.62 \times 10^{-6}$ | 0                       | $1.07 \times 10^{-4}$ |
|       | Female | $8.76 \times 10^{-5}$ | 0                     | $6.30 \times 10^{-6}$ | $6.19 \times 10^{-6}$ | 0                       | $1.00 \times 10^{-4}$ |
| 240 h | Male   | $4.63 \times 10^{-5}$ | 0                     | 0                     | 0                     | 0                       | $4.63 \times 10^{-5}$ |
|       | Female | $4.33 \times 10^{-5}$ | 0                     | 0                     | 0                     | 0                       | $4.33 \times 10^{-5}$ |
